# Supplementary material for: Hydrogel-Based Microneedle as a Drug Delivery System
Source: MDPI journal article supplement (doi:10.3390/pharmaceutics15102444), 2023-10-10
Supplement: s1 [file s1]

**Table S1:** Supporting data for “New approaches for hydrogel-based MN patch” topic.

| 4.1.1 STIMULUS RESPONSE                                                                    |                                                                                                                           |                        |                                                                                                                                                                                                                                                                                                                                                   |       |
|--------------------------------------------------------------------------------------------|---------------------------------------------------------------------------------------------------------------------------|------------------------|---------------------------------------------------------------------------------------------------------------------------------------------------------------------------------------------------------------------------------------------------------------------------------------------------------------------------------------------------|-------|
| PVA with S-nitrosoglutathione and graphene oxide (GO)                                      | Nitric oxide (NO)<br><b>DSP:</b> biofilm-infected chronic wounds                                                          | Forming MN             | The test results showed that an increase in temperature increased the release of NO from the patch and thus enhanced antibacterial performance.                                                                                                                                                                                                   | [67]  |
| pNIPAM                                                                                     | Insulin<br><b>DSP:</b> No specified                                                                                       | Hollow MNs             | The system exhibited an evident volume shrinkage, excellent photothermal ability and repeatable NIR-responsiveness.                                                                                                                                                                                                                               | [110] |
| Polyvinylpyrrolidone MNs coated with chitosan and Poly (vinyl alcohol) Hydrogel            | Doxorubicin and AuMSS nanorods (Dox@MicroN)<br><b>DSP:</b> Cervical Cancer                                                | Coated MN              | MNs structures can efficiently penetrate the tumor-mimicking agarose gel and release the Dox with a pH- and thermo-responsive profile. Furthermore, the system composed of Dox and AuMSS nanorods was able to simultaneously mediate the chemo- and photothermal-therapies rendered a superior cytotoxic effect against the cervical cancer cells | [15]  |
| Mussel adhesive protein (MAP)-based shell and a non-swellable silk fibroin (SF)-based core | Fluorescein isothiocyanate (FITC)-conjugated dextran<br><b>DSP:</b> Wound Healing                                         | Forming MN             | The protein-based hydrogel system achieved <i>in vitro</i> sustained releases for at least 7 days via swelling-mediated diffusion and enzymatic degradation                                                                                                                                                                                       | [45]  |
| Chitosan-porous carbon nanocomposites                                                      | Cephalexin<br><b>DSP:</b> No specified                                                                                    | Dissolving MNs         | The system responded to acidic pH 4 and electric pulse 5 V for drug release                                                                                                                                                                                                                                                                       | [112] |
| Methacrylated Hyaluronic Acid                                                              | Estrogen receptor alpha (ER $\alpha$ )-degrading PROTAC - ERD308 and Palbociclib<br><b>DSP:</b> ER-positive breast cancer | Disolving MNs          | The patch was effective in overcoming the problems involved with PROTAC systems, which had high rates of local drug retention (87%). Furthermore, the combination with pH-responsive micelles allowed the co-release of Palbociclib specific to the tumor acid environment for effective therapy against breast cancer.                           | [27]  |
| 4.1.2 INDUCED CONTROLLED RELEASE                                                           |                                                                                                                           |                        |                                                                                                                                                                                                                                                                                                                                                   |       |
| PVA and poly(ethyleneimine) with MBA how cross-linking agent                               | Indomethacin<br><b>DSP:</b> Anti-inflammatory effect                                                                      | Dissolving MNs         | This investigation provided the efficacy of the device for attaining electro-modulated drug release in the ex vivo porcine model.                                                                                                                                                                                                                 | [78]  |
| PVA with poly(ethyleneimine) solution (PEI) and 1 vinylimidazole (VI)                      | Indomethacin<br><b>DSP:</b> Anti-inflammatory effect                                                                      | Dissolving MNs         | Both <i>in vitro</i> and <i>in vivo</i> studies revealed a good preliminary indication that the system have electro-responsive capabilities, ultimately facilitating the immediate release of indomethacin.                                                                                                                                       | [84]  |
| Polyvinylpyrrolidone based graphene oxide HG                                               | L-Ascorbic acid<br><b>DSP:</b> No specified                                                                               | Dissolving MNs         | New platform electricity responsive for drug deliver. The drug-release efficiency of the system with graphene oxide was increased by more than 2 times compared to the system without graphene oxide when 5 V was applied.                                                                                                                        | [95]  |
| PVP with gold and silver electrodes                                                        | Ascorbic Acid<br><b>DSP:</b> No specified                                                                                 | Hydrogel Dissolving MN | The system was extremely efficient in controlling drug release. It was influenced by temperature, irradiation and electricity.                                                                                                                                                                                                                    | [98]  |

### 4.1.3 SUSTAINED AND LONG-TERM THERAPY

|                                                                                                                                                             |                                                                                                                    |                           |                                                                                                                                                                                                                                                                                                                                                                            |       |
|-------------------------------------------------------------------------------------------------------------------------------------------------------------|--------------------------------------------------------------------------------------------------------------------|---------------------------|----------------------------------------------------------------------------------------------------------------------------------------------------------------------------------------------------------------------------------------------------------------------------------------------------------------------------------------------------------------------------|-------|
| Gelatin methacryloyl (GelMA)                                                                                                                                | Doxorubicin<br><b>DSP:</b> Melanoma                                                                                | Dissolving MNs            | The drug release rate can be adjusted by controlling the degree of polymer cross-linking.                                                                                                                                                                                                                                                                                  | [10]  |
| Poly (vinyl alcohol)                                                                                                                                        | Doxorubicin<br><b>DSP:</b> Skin cancer                                                                             | Forming MNs               | The insertion of MNs resulted in a significantly greater delivery of doxorubicin into and across human skin, as compared to passive diffusion                                                                                                                                                                                                                              | [17]  |
| $\beta$ -Cyclodextrin Conjugated Gelatin Methacryloyl                                                                                                       | Curcumin<br><b>DSP:</b> Melanoma                                                                                   | Dissolving MNs            | The Gelatin methacryloyl (GelMA) - $\beta$ -CD/CUR MN exhibits relatively higher therapeutic efficacy through more localized and deeper penetrated manner compared with a control nontransdermal patch for anticancer activities. <i>In vivo</i> studies also verify biocompatibility and degradability of the Gelatin methacryloyl (GelMA) - $\beta$ -CD MN arrays patch. | [9]   |
| Sodium alginate and sulfobetaine methacrylate using <i>N, N'</i> -methylenebisacrylamide and $\text{Ca}^{2+}$                                               | Doxorubicin and Lipopolissacarides<br><b>DSP:</b> Glioma Tumor                                                     | Dissolving MNs            | Adequate amounts of drugs were released from the MNs in the first 24 h, followed by a very gradual and sustained release for the next 7 d.                                                                                                                                                                                                                                 | [20]  |
| PVA                                                                                                                                                         | Rhodamine B<br><b>DSP:</b> No specified                                                                            | Dissolving MN             | In this study, the system showed dissolution after 17 minutes and good swelling properties and a consistent release of the model drug RD up to 12 days                                                                                                                                                                                                                     | [100] |
| Gelatin Methacryloyl                                                                                                                                        | Galunisertib<br><b>DSP:</b> Myocardiatic infarction                                                                | Dissolving MNs            | The drug-release properties can be controlled by adjusting the degree of crosslinking to ensure sustained release for at least 15 days after application.                                                                                                                                                                                                                  | [7]   |
| Polyethylene glycol diacrylate (PEGDA)                                                                                                                      | Gencitabine<br><b>DSP:</b> Inflammatory breast cancer                                                              | Coated MNs                | Thinking about a rapid release system, 100% of the drug was released in the first hour of administration with a system manufactured with high retention.                                                                                                                                                                                                                   | [25]  |
| Multifunctional Silk Fibroin Methacryloyl                                                                                                                   | Prussian blue nanozymes (PBNs) and vascular endothelial growth factor (VEGF)<br><b>DSP:</b> Diabetic Wound Healing | Dissolving MNs            | The system exhibits excellent biocompatibility, drug-sustained release, pro angiogenesis, antioxidant, and antibacterial properties with sustained release after 9 days.                                                                                                                                                                                                   | [54]  |
| $\text{Ti}_2\text{C}_3$ MXenes-integrated poly- $\gamma$ -glutamic acid ( $\gamma$ -PGA) hydrogel MNs                                                       | Asiaticoside<br><b>DSP:</b> Diabetic Foot Ulcer                                                                    | Dissolving MNs            | The system was shown to be a multifunctional subcutaneous drug-delivering system for accelerating diabetic wound healing for 14 days.                                                                                                                                                                                                                                      | [55]  |
| Polyvinyl Alcohol                                                                                                                                           | Parathyroid hormone (PTH)<br><b>DSP:</b> Wound Healing                                                             | Forming MNs               | Was demonstrated an intermittent systemic administration of PTH using our PTMN patches accelerated skin wound healing, evaluated for 14 days                                                                                                                                                                                                                               | [41]  |
| Poly (vinyl alcohol) and poly (methyl vinyl ether co-maleic anhydride/acid (Gantrez® S-97), polyethylene glycol (PEG 10,000) and $\text{Na}_2\text{CO}_3$ . | Bevacizumab<br><b>DSP:</b> Immunotherapy for cancer                                                                | Dissolving and Forming MN | BEV was detected and measured in plasma across 7 days following one single application of MN arrays. BEV had lymphatic accumulation <i>in vivo</i> . This could prove to be a viable option for treatment of lymphomas and secondary metastatic tumors.                                                                                                                    | [18]  |

#### 4.1.4 LOCALIZED AND SYSTEMIC TREATMENT

|                                                                                     |                                                                                                                                                   |                           |                                                                                                                                                                                                       |      |
|-------------------------------------------------------------------------------------|---------------------------------------------------------------------------------------------------------------------------------------------------|---------------------------|-------------------------------------------------------------------------------------------------------------------------------------------------------------------------------------------------------|------|
| Gantrez® S-97 and PEG                                                               | Esketamine (ESK)<br><b>DSP:</b> Depression                                                                                                        | Forming MNs               | The authors aimed to achieve sustained therapeutic levels in plasma over 24 h using ESK-containing drug reservoirs in combination with hydrogel forming MNs in this <i>in vivo</i> feasibility study. | [58] |
| Poly(vinylpyrrolidone) or Gantrez® S-97                                             | Donepezil<br><b>DSP:</b> Alzheimer                                                                                                                | Forming MN                | The authors aimed to achieve sustained therapeutic levels in plasma over 24 h, using the optimum patch formulation.                                                                                   | [59] |
| Poly-c-glutamic acid (c-PGA) and poly vinyl pyrrolidone-polyvinyl alcohol (PVP/PVA) | Insulin<br><b>DSP:</b> Diabetes                                                                                                                   | Dissolving MNs            | The MNs patch after insertion, dissolve into the skin within 4 min to deliver the entire drug load, without requiring the users to remove any sharps or waste.                                        | [49] |
| Carboxymethyl cellulose                                                             | Protein MERS-S1f, MERS-S1fRS09, MERS-S1ffliC, SARS-CoV-2-S1, or SARSCoV-2-S1fRS09 for antigen stimulator<br><b>DSP:</b> Corona Virus (SARS-CoV-2) | Dissolving MNs            | The Hydrogel-based vaccine MNs elicited strong and long-lasting antigen-specific antibody responses                                                                                                   | [28] |
| Gantrez® S-97 and poly(ethylene glycol) (PEG)                                       | Protein antigen ovalbumin (OVA)<br><b>DSP:</b> Adjuvant for vaccination                                                                           | Forming and Dissolving MN | The system has yielded enhanced immune responses, suggesting the possibility lower dosing and equivalent outcomes as traditional needle and syringe methods.                                          | [29] |
| PVA and polyvinyl pyrrolidone (PVP)                                                 | Sildenafil citrate<br><b>DSP:</b> Erectly Dysfunction                                                                                             | Forming MN                | The ex vivo permeation study showed that up to 80% of Sildenafil Citrate was delivered transdermally from this combined dosage in evaluation of 14 days                                               | [76] |
| PVA and polyvinyl pyrrolidone (PVP)                                                 | Sildenafil citrate<br><b>DSP:</b> Pulmonary hypertension                                                                                          | Forming MN                | Increasing SC bioavailability in treating pulmonary arterial hypertension is another benefit of this preparation                                                                                      | [93] |

| <b>4.1.5 SELF ACTIVE</b>                                     |                                                                                                                  |                |                                                                                                                                                                                                                                                                                                                 |      |
|--------------------------------------------------------------|------------------------------------------------------------------------------------------------------------------|----------------|-----------------------------------------------------------------------------------------------------------------------------------------------------------------------------------------------------------------------------------------------------------------------------------------------------------------|------|
| Chitosan polyethylenimine antimicrobial Polymer              | Amphotericin B<br><b>DSP:</b> Fungal Infections                                                                  | Dissolving MN  | The results of combination system attributable to the high bioavailability of therapeutics and synergistic actions of the antifungal polymer and drug.                                                                                                                                                          | [72] |
| Chitosan-NIPAM Hydrogel                                      | Vascular endothelial growth factor (VEGF)<br><b>DSP:</b> Precaution of infections and promotion of Wound Healing | Dissolving MNs | The system exhibited a superior capability of acceleration in inflammatory inhibition, collagen deposition, angiogenesis, and granulation tissue formation. In addition, a controlled release can be achieved with thermoresponsive NIPAM                                                                       | [70] |
| Chitosan (CS) and zinc nitrate (CS-Zn [III] MNs)             | Chitosan and Zn NP<br><b>DSP:</b> Bacterial Biofilm                                                              | Dissolving MNs | The system which not only can directly transport CS and Zn <sup>2+</sup> into the bacterial biofilm, but also offer a large specific surface area, to facilitate the diffusion within biofilm and effectively eradicate the bacterial biofilm.                                                                  | [71] |
| <b>4.1.6 PRECAUTION OF SIDE EFFECTS AND LOW BIOAVAILABLE</b> |                                                                                                                  |                |                                                                                                                                                                                                                                                                                                                 |      |
| Photocrosslinked methacrylated hyaluronic acid (MeHA)        | Glucagon<br><b>DSP:</b> Diabetes treatment problems                                                              | Dissolving MN  | The system successfully prevented hypoglycemia induced by overdosed insulin administration in rat model. The results from this work warrants further development of the transdermal glucagon delivery system as a solution to potential lifethreatening complications associated with intensive insulin therapy | [52] |
| Polyacrylic acid                                             | Naloxone<br><b>DSP:</b> Management of side effects of opioids                                                    | Dissolving MNs | Naloxone permeation through intact skin was highest from pH 7.4 gels when naloxone is unionized                                                                                                                                                                                                                 | [92] |
| Gelatin methacryloyl (GelMA)                                 | L-DOPA<br><b>DSP:</b> Parkinson                                                                                  | Dissolving MNs | The system has reached a released L-DOPA directly entered the blood, which reduces the side effects on the gastrointestinal tract and improves the utilization rate of the drug.                                                                                                                                | [60] |
